# Supplementary material
Source: PubMed Central journal article supplement (PMC2853449)
Supplement: supp_D001768_jlr.D001768-1.pdf [file supp_D001768_jlr.D001768-1.pdf]

**Table S1.** List of phosphocholines and sphingomyelin fragmentation diagnostic ions observed in MALDI-MS/MS spectra from bovine embryos.

| <b>Precursor Ion</b>                                                                   | <b>Most Intense MS/MS Ion</b>                                                                                                                   | <b><i>m/z</i></b>          | <b>Observation</b>                                   |
|----------------------------------------------------------------------------------------|-------------------------------------------------------------------------------------------------------------------------------------------------|----------------------------|------------------------------------------------------|
| <b>Phosphatidylcholine</b><br><br><b>[PC+Na]<sup>+</sup> or<br/>[PC+H]<sup>+</sup></b> | [M+Na] <sup>+</sup> - N(CH <sub>3</sub> ) <sub>3</sub><br>[M+H] <sup>+</sup> - N(CH <sub>3</sub> )                                              | [M+Na] - 59<br>[M+Na] - 59 | Neutral loss of trimethylamine                       |
|                                                                                        | [M+Na] <sup>+</sup> - C <sub>5</sub> H <sub>14</sub> PO <sub>4</sub> N<br>[M+H] <sup>+</sup> - C <sub>5</sub> H <sub>14</sub> PO <sub>4</sub> N | [M+Na]-183<br>[M+H]-183    | Neutral loss of head group (phosphorylcholine)       |
| <b>and</b>                                                                             |                                                                                                                                                 |                            |                                                      |
| <b>Sphingomyelin</b><br><br><b>[SM+Na]<sup>+</sup><br/>[SM+H]<sup>+</sup></b>          | [C <sub>2</sub> H <sub>5</sub> O <sub>4</sub> P+Na] <sup>+</sup>                                                                                | 147                        | Sodiated cyclophosphane                              |
|                                                                                        | [C <sub>5</sub> H <sub>15</sub> PO <sub>4</sub> N] <sup>+</sup>                                                                                 | 184                        | Polar head group                                     |
| <b>Triacylglycerol</b><br><br><b>[TAG+Na]<sup>+</sup></b>                              | [M+Na] <sup>+</sup> -RCOONa                                                                                                                     | [M- RCOONa] <sup>+</sup>   | Loss of one of the fatty acid, as sodium carboxilate |

R= alkyl group derived from fatty chain
