# Supplementary material
Source: PubMed Central journal article supplement (PMC2853449)
Supplement: supp_D001768_jlr.D001768-2.pdf [file supp_D001768_jlr.D001768-2.pdf]

**S2.** Values of minimal (min) and maximal (max) relative ion intensities found among the lipid ions in spectra, and percentage (%) of the samples presenting each  $m/z$  from attributed phospholipids and triacylglycerols detected in positive MALDI-MS mass spectra of single oocytes from human (*Homo sapiens*) oocytes, bovine (*Bos taurus*) oocytes, bovine in vivo-derived embryos (blastocysts), sheep (*Ovis aries*) oocytes, fish (*Mugil spp.*) oocytes, and ant (*Solenopsis spp.*) embryos.

| m/z   | human oocytes (N=10) |       |       | bovine oocytes (N=6) |       |       | bovine embryos (N=8) |       |       | sheep oocytes (N=6) |       |       | fish ova (N=9) |       |       | ant embryos (N=6) |       |       |
|-------|----------------------|-------|-------|----------------------|-------|-------|----------------------|-------|-------|---------------------|-------|-------|----------------|-------|-------|-------------------|-------|-------|
|       | min                  | max   | %     | min                  | max   | %     | min                  | max   | %     | min                 | max   | %     | min            | max   | %     | min               | max   | %     |
| 703.5 | 14.3                 | 50.1  | 100.0 | n.d.                 | 43.4  | 66.7  | n.d.                 | 52.6  | 75.0  | 17.0                | 45.7  | 100.0 | -              | -     | -     | -                 | -     | -     |
| 723.5 | n.d.                 | 39.5  | 90.0  | 28.5                 | 34.9  | 100.0 | n.d.                 | 40.3  | 75.0  | n.d.                | 32.2  | 66.7  | -              | -     | -     | -                 | -     | -     |
| 725.5 | n.d.                 | 38.8  | 90.0  | 18.4                 | 30.4  | 100.0 | 47.6                 | 98.5  | 100.0 | n.d.                | 33.0  | 83.3  | -              | -     | -     | -                 | -     | -     |
| 731.5 | -                    | -     | -     | -                    | -     | -     | -                    | -     | -     | n.d.                | 42.8  | 83.3  | -              | -     | -     | -                 | -     | -     |
| 732.5 | 28.5                 | 44.9  | 100.0 | n.d.                 | 28.6  | 66.7  | n.d.                 | 28.0  | 37.5  | -                   | -     | -     | 11.3           | 18.0  | 100.0 | -                 | -     | -     |
| 734.6 | -                    | -     | -     | n.d.                 | 34.5  | 83.3  | n.d.                 | 20.0  | 25.0  | -                   | -     | -     | -              | -     | -     | -                 | -     | -     |
| 753.6 | 14.8                 | 43.3  | 100.0 | -                    | -     | -     | -                    | -     | -     | n.d.                | 43.2  | 83.3  | -              | -     | -     | -                 | -     | -     |
| 754.6 | 27.4                 | 45.4  | 100.0 | n.d.                 | 30.2  | 83.3  | n.d.                 | 22.9  | 37.5  | -                   | -     | -     | 8.2            | 23.3  | 100.0 | -                 | -     | -     |
| 756.6 | -                    | -     | -     | n.d.                 | 32.3  | 83.3  | n.d.                 | 18.6  | 25.0  | -                   | -     | -     | n.d.           | 20.2  | 77.8  | -                 | -     | -     |
| 758.6 | 41.2                 | 69.6  | 100.0 | n.d.                 | 29.5  | 66.7  | n.d.                 | 28.35 | 50.0  | -                   | -     | -     | n.d.           | 13.5  | 33.3  | n.d.              | 25.4  | 33.3  |
| 760.6 | 76.3                 | 100.0 | 100.0 | 72.8                 | 100.0 | 100   | 95.1                 | 61.26 | 100.0 | 88.9                | 100.0 | 100.0 | 20.1           | 36.4  | 100.0 | n.d.              | 43.1  | 33.3  |
| 762.6 | n.d.                 | 17.5  | 30.0  | n.d.                 | 20.2  | 66.7  | n.d.                 | 25.3  | 75.0  | n.d.                | 21.6  | 50.0  | -              | -     | -     | -                 | -     | -     |
| 772.6 | -                    | -     | -     | -                    | -     | -     | -                    | -     | -     | -                   | -     | -     | n.d.           | 13.4  | 44.4  | -                 | -     | -     |
| 780.6 | 34.8                 | 62.9  | 100.0 | v                    | 24.1  | 66.7  | n.d.                 | 21.5  | 37.5  | -                   | -     | -     | 30.0           | 39.1  | 100.0 | n.d.              | 28.7  | 33.3  |
| 782.6 | 69.6                 | 100.0 | 100.0 | 89.6                 | 100.0 | 100   | 52.5                 | 87.3  | 100.0 | 94.6                | 100.0 | 100.0 | 21.4           | 46.0  | 100.0 | n.d.              | 55.3  | 66.6  |
| 784.6 | n.d.                 | 31.8  | 90.0  | n.d.                 | 29.7  | 83.3  | n.d.                 | 33.9  | 75.0  | n.d.                | 30.3  | 83.3  | n.d.           | 14.1  | 33.3  | n.d.              | 53.6  | 50.0  |
| 786.6 | n.d.                 | 33.0  | 80.0  | n.d.                 | 23.6  | 50.0  | 47.6                 | 100.0 | 100.0 | -                   | -     | -     | n.d.           | 18.2  | 88.9  | n.d.              | 100.0 | 66.7  |
| 788.6 | n.d.                 | 31.2  | 80.0  | -                    | -     | -     | 63.6                 | 100.0 | 100.0 | n.d.                | 23.3  | 66.7  | n.d.           | 12.4  | 44.4  | n.d.              | 48.7  | 33.3  |
| 802.6 | -                    | -     | -     | -                    | -     | -     | -                    | -     | -     | -                   | -     | -     | 19.1           | 35.2  | 100.0 | -                 | -     | -     |
| 804.6 | -                    | -     | -     | -                    | -     | -     | -                    | -     | -     | n.d.                | 18.7  | 33.3  | 18.0           | 24.9  | 100.0 | n.d.              | 23.4  | 50.0  |
| 806.6 | n.d.                 | 18.3  | 20.0  | -                    | -     | -     | -                    | -     | -     | -                   | -     | -     | 79.6           | 100.0 | 100.0 | n.d.              | 51.7  | 66.7  |
| 808.6 | n.d.                 | 28.5  | 60.0  | n.d.                 | 22.0  | 50.0  | 45.0                 | 81.0  | 100.0 | n.d.                | 27.6  | 33.3  | 40.2           | 50.6  | 100.0 | n.d.              | 90.0  | 66.7  |
| 810.6 | n.d.                 | 27.0  | 70.0  | -                    | -     | -     | 56.8                 | 100.0 | 100.0 | n.d.                | 28.3  | 83.3  | n.d.           | 18.1  | 88.9  | n.d.              | 39.9  | 33.3  |
| 828.6 | -                    | -     | -     | -                    | -     | -     | -                    | -     | -     | -                   | -     | -     | 60.4           | 100.0 | 100.0 | -                 | -     | -     |
| 830.6 | -                    | -     | -     | -                    | -     | -     | -                    | -     | -     | -                   | -     | -     | 26.1           | 43.6  | 100.0 | -                 | -     | -     |
| 832.6 | -                    | -     | -     | -                    | -     | -     | -                    | -     | -     | -                   | -     | -     | 24.5           | 31.7  | 100.0 | -                 | -     | -     |
| 834.6 | -                    | -     | -     | -                    | -     | -     | n.d.                 | 17.4  | 37.5  | -                   | -     | -     | 24.9           | 32.5  | 100.0 | -                 | -     | -     |
| 836.6 | -                    | -     | -     | -                    | -     | -     | n.d.                 | 22.4  | 25.0  | -                   | -     | -     | n.d.           | 15.4  | 55.5  | -                 | -     | -     |
| 851.7 | -                    | -     | -     | -                    | -     | -     | -                    | -     | -     | -                   | -     | -     | -              | -     | -     | n.d.              | 18.2  | 33.3  |
| 853.7 | -                    | -     | -     | -                    | -     | -     | -                    | -     | -     | -                   | -     | -     | n.d.           | 16.8  | 55.5  | 23.4              | 40.5  | 100.0 |
| 855.7 | -                    | -     | -     | n.d.                 | 28.2  | 50.0  | -                    | -     | -     | -                   | -     | -     | 9.0            | 14.4  | 100.0 | 21.9              | 44.4  | 100.0 |
| 856.6 | -                    | -     | -     | -                    | -     | -     | n.d.                 | 45.9  | 50.0  | -                   | -     | -     | 17.5           | 28.9  | 100.0 | -                 | -     | -     |
| 877.7 | -                    | -     | -     | -                    | -     | -     | -                    | -     | -     | -                   | -     | -     | -              | -     | -     | n.d.              | 44.5  | 66.7  |
| 879.7 | -                    | -     | -     | -                    | -     | -     | -                    | -     | -     | -                   | -     | -     | -              | -     | -     | 40.5              | 100.0 | 100.0 |
| 881.7 | -                    | -     | -     | n.d.                 | 26.4  | 33.0  | -                    | -     | -     | -                   | -     | -     | -              | -     | -     | 70.2              | 100.0 | 100.0 |
| 883.7 | -                    | -     | -     | -                    | -     | -     | -                    | -     | -     | -                   | -     | -     | -              | -     | -     | 32.8              | 58.8  | 100.0 |
| 895.7 | -                    | -     | -     | -                    | -     | -     | -                    | -     | -     | -                   | -     | -     | -              | -     | -     | n.d.              | 68.6  | 83.3  |
| 897.7 | -                    | -     | -     | -                    | -     | -     | -                    | -     | -     | -                   | -     | -     | -              | -     | -     | 15.3              | 64.1  | 100.0 |
| 899.7 | -                    | -     | -     | -                    | -     | -     | -                    | -     | -     | -                   | -     | -     | -              | -     | -     | n.d.              | 34.5  | 66.7  |
| 901.7 | -                    | -     | -     | -                    | -     | -     | -                    | -     | -     | -                   | -     | -     | -              | -     | -     | n.d.              | 20.4  | 50.0  |
| 903.7 | -                    | -     | -     | -                    | -     | -     | -                    | -     | -     | -                   | -     | -     | -              | -     | -     | n.d.              | 56.2  | 66.7  |
| 905.7 | -                    | -     | -     | -                    | -     | -     | -                    | -     | -     | -                   | -     | -     | -              | -     | -     | 21.0              | 100.0 | 100.0 |
| 907.7 | -                    | -     | -     | -                    | -     | -     | -                    | -     | -     | -                   | -     | -     | -              | -     | -     | 48.4              | 100.0 | 100.0 |
| 909.7 | -                    | -     | -     | -                    | -     | -     | -                    | -     | -     | -                   | -     | -     | -              | -     | -     | 41.6              | 55.8  | 100.0 |
| 911.7 | -                    | -     | -     | -                    | -     | -     | -                    | -     | -     | -                   | -     | -     | -              | -     | -     | n.d.              | 25.4  | 83.3  |
| 919.7 | -                    | -     | -     | -                    | -     | -     | -                    | -     | -     | -                   | -     | -     | -              | -     | -     | n.d.              | 42.0  | 66.7  |
| 921.7 | -                    | -     | -     | -                    | -     | -     | -                    | -     | -     | -                   | -     | -     | -              | -     | -     | n.d.              | 79.4  | 66.7  |
| 923.7 | -                    | -     | -     | -                    | -     | -     | -                    | -     | -     | -                   | -     | -     | -              | -     | -     | 24.6              | 78.3  | 83.3  |
| 925.7 | -                    | -     | -     | -                    | -     | -     | -                    | -     | -     | -                   | -     | -     | -              | -     | -     | 14.3              | 42.9  | 83.3  |

n.d.: not detected
